# Supplementary material for: Integrative multiomics analysis of human atherosclerosis reveals a serum response factor‐driven network associated with intraplaque hemorrhage
Source: PubMed Central journal article supplement (PMC8236116; doi:10.1002/ctm2.458), 2021-06-27
Supplement: CTM2-11-e458-s003.pdf [file CTM2-11-e458-s003.pdf]

**Figure S6**

**A**

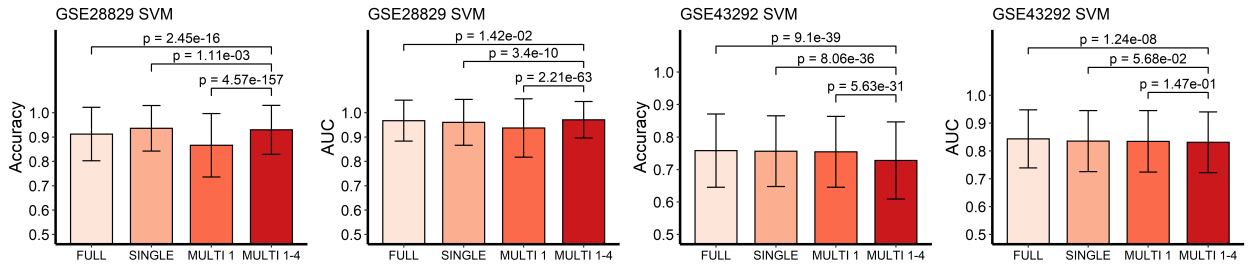

**B**

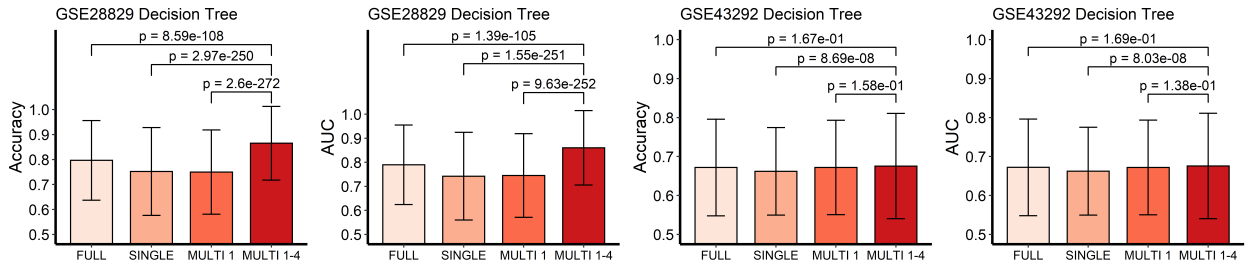

**Figure S6 Validation of selected gene sets in independent cohorts**

Classification performance based on single-omics (SINGLE), multi-omics component 1 (MULTI 1), and multi-omics component 1-4 (MULTI 1-4) feature subsets as well as the full data (FULL) as a baseline on two independent cohorts GSE28829 and GSE43292. Results were measured by accuracy and AUC using SVM (A) and decision tree (B), respectively, with stratified 5-folds cross-validation and 1,000 random repeats. Results are presented as mean  $\pm$  SD.
