# Supplementary material for: Integrative multiomics analysis of human atherosclerosis reveals a serum response factor‐driven network associated with intraplaque hemorrhage
Source: PubMed Central journal article supplement (PMC8236116; doi:10.1002/ctm2.458), 2021-06-27
Supplement: CTM2-11-e458-s005.pdf [file CTM2-11-e458-s005.pdf]

**Figure S1**

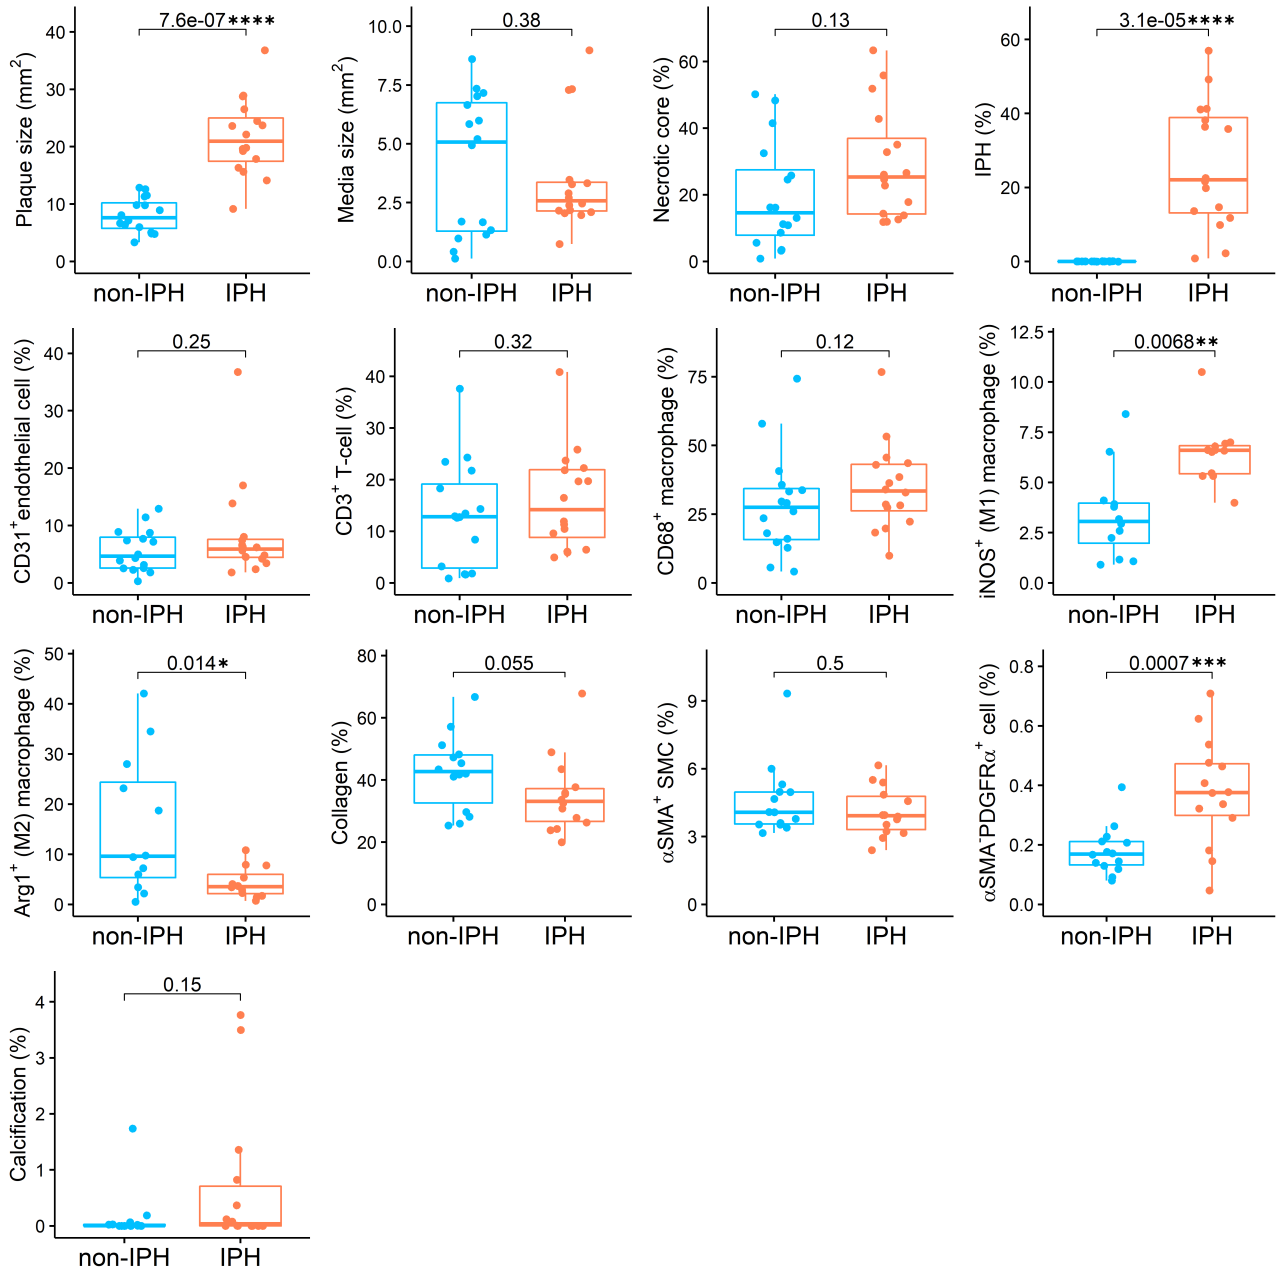

**Figure S1 Distribution of plaque traits**

Distribution of plaque traits between paired non-IPH and IPH (both n = 16) samples.
