# Supplementary material for: Integrative multiomics analysis of human atherosclerosis reveals a serum response factor‐driven network associated with intraplaque hemorrhage
Source: PubMed Central journal article supplement (PMC8236116; doi:10.1002/ctm2.458), 2021-06-27
Supplement: CTM2-11-e458-s006.pdf [file CTM2-11-e458-s006.pdf]

# Figure S2

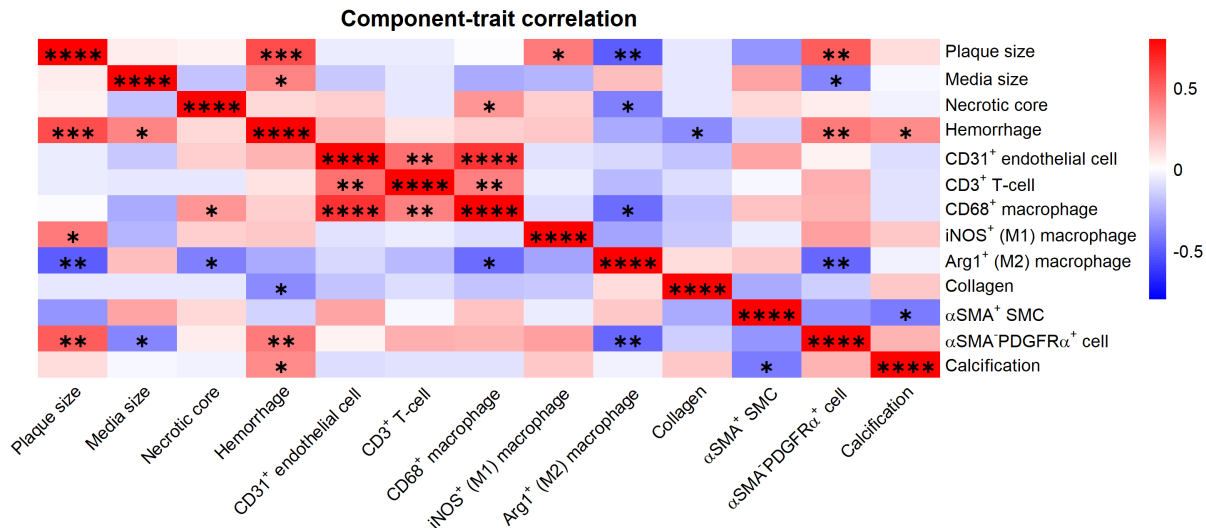

## Figure S2 Correlations between plaque traits

Heatmap showing correlations between plaque traits.
